# Supplementary material for: Time course of 75%–100% efficacy response of adjunctive brivaracetam
Source: PubMed Central journal article supplement — Acta Neurol Scand. 2020 Jun 9;142(2):175–80. doi: 10.1111/ane.13287 (PMC7422720; doi:10.1111/ane.13287), 2020-06-09
Supplement: ANE-142-175-s001.pdf [file ANE-142-175-s001.pdf]

**Supplementary Table 1.** Patients achieving sustained response and response in the overall population of patients with focal seizures

|                                                                      | Placebo<br>(n=418) | BRV 50 mg/day<br>(n=161) |                      | BRV 100 mg/day<br>(n=332) |                      | BRV 200 mg/day<br>(n=249) |                      |
|----------------------------------------------------------------------|--------------------|--------------------------|----------------------|---------------------------|----------------------|---------------------------|----------------------|
|                                                                      | KM estimate<br>(%) | KM estimate<br>(%)       | P-value <sup>a</sup> | KM estimate<br>(%)        | P-value <sup>a</sup> | KM estimate<br>(%)        | P-value <sup>a</sup> |
| <b>≥75% Sustained Response in Focal Seizure Reduction</b>            |                    |                          |                      |                           |                      |                           |                      |
| Sustained response from day 1                                        | 3.1                | 5.0                      | .2842                | 10.8                      | <.0001               | 9.3                       | .0006                |
| Sustained response from day 84                                       | 6.7                | 13.0                     | .0141                | 19.6                      | <.0001               | 17.8                      | <.0001               |
| KM estimates of patients achieving response <sup>b</sup> on day 1, % | 65.6               | 82.6                     | <.0001               | 79.8                      | <.0001               | 81.0                      | <.0001               |
| <b>≥90% Sustained Response in Focal Seizure Reduction</b>            |                    |                          |                      |                           |                      |                           |                      |
| Sustained response from day 1                                        | 1.2                | 3.1                      | .1144                | 6.9                       | <.0001               | 5.3                       | .0018                |
| Sustained response from day 84                                       | 2.4                | 4.3                      | .2121                | 11.1                      | <.0001               | 7.7                       | .0012                |
| KM estimates of patients achieving response <sup>b</sup> on day 1, % | 65.1               | 82.6                     | <.0001               | 78.9                      | <.0001               | 81.0                      | <.0001               |
| <b>100% Sustained Response in Focal Seizure Reduction</b>            |                    |                          |                      |                           |                      |                           |                      |
| Sustained response from day 1                                        | 0.5                | 2.5                      | .0329                | 5.1                       | <.0001               | 4.0                       | .0008                |
| Sustained response from day 84                                       | 0.5                | 2.5                      | .0329                | 5.4                       | <.0001               | 4.0                       | .0008                |
| KM estimates of patients achieving response <sup>b</sup> on day 1, % | 65.1               | 82.6                     | <.0001               | 78.9                      | <.0001               | 81.0                      | <.0001               |

<sup>a</sup>P values represent treatment differences in Kaplan Meier estimates vs placebo.

<sup>b</sup>Estimates represent the response at any specific time point *not the sustained response* through the treatment period.

BRV, brivaracetam; KM, Kaplan-Meier

**Supplementary Table 2.** Patients achieving sustained response and response in the subpopulation of patients with FBTCS

|                                                                      | Placebo<br>(n=115) | BRV 50 mg/day<br>(n=62) |                      | BRV 100 mg/day<br>(n=100) |                      | BRV 200 mg/day<br>(n=75) |                      |
|----------------------------------------------------------------------|--------------------|-------------------------|----------------------|---------------------------|----------------------|--------------------------|----------------------|
|                                                                      | KM estimate<br>(%) | KM estimate<br>(%)      | P-value <sup>a</sup> | KM estimate<br>(%)        | P-value <sup>a</sup> | KM estimate<br>(%)       | P-value <sup>a</sup> |
| <b>≥75% Sustained Response in FBTCS Reduction</b>                    |                    |                         |                      |                           |                      |                          |                      |
| Sustained response from day 1                                        | 15.7               | 25.8                    | .1028                | 35.0                      | .0011                | 41.3                     | <.0001               |
| Sustained response from day 84                                       | 20.9               | 33.9                    | .0588                | 45.0                      | .0002                | 45.3                     | .0004                |
| KM estimates of patients achieving response <sup>b</sup> on day 1, % | 87.8               | 95.2                    | .1151                | 95.0                      | .0652                | 92.0                     | .3608                |
| <b>≥90% Sustained Response in FBTCS Reduction</b>                    |                    |                         |                      |                           |                      |                          |                      |
| Sustained response from day 1                                        | 14.8               | 22.6                    | .1941                | 34.0                      | .001                 | 37.3                     | .0004                |
| Sustained response from day 84                                       | 15.7               | 24.2                    | .1651                | 36.0                      | .0006                | 40.0                     | .0002                |
| KM estimates of patients achieving response <sup>b</sup> on day 1, % | 87.8               | 95.2                    | .1151                | 95.0                      | .0652                | 92.0                     | .3608                |
| <b>100% Sustained Response in FBTCS Reduction</b>                    |                    |                         |                      |                           |                      |                          |                      |
| Sustained response from day 1                                        | 14.8               | 22.6                    | .1941                | 32.0                      | .0027                | 36.0                     | .0007                |
| Sustained response from day 84                                       | 14.8               | 22.6                    | .1941                | 32.0                      | .0027                | 36.0                     | .0007                |
| KM estimates of patients achieving response <sup>b</sup> on day 1, % | 87.8               | 95.2                    | .1151                | 95.0                      | .0652                | 92.0                     | .3608                |

<sup>a</sup>P values represent treatment differences in Kaplan Meier estimates vs placebo.

<sup>b</sup>Estimates represent the response at any specific time point *not the sustained response* through the treatment period.

BRV, brivaracetam; FBTCS, focal to bilateral tonic-clonic seizures; KM, Kaplan-Meier.
